# Supplementary material for: Al Rmo. Señor Vicario General Dr. Juan de Dios Campuzano. Latacunga, 25 febrero de 1887
Source: MDPI journal article supplement (doi:10.3390/cancers13092245), 1887-01-01
Supplement: s1 [file s1]

# Supplementary Materials: In Vitro and In Vivo Cell Uptake of a Cell-Penetrating Peptide Conjugated with Fluorescent Dyes Having Different Chemical Properties

Hideo Takakura, Honoka Sato, Kohei Nakajima, Motofumi Suzuki and Mikako Ogawa

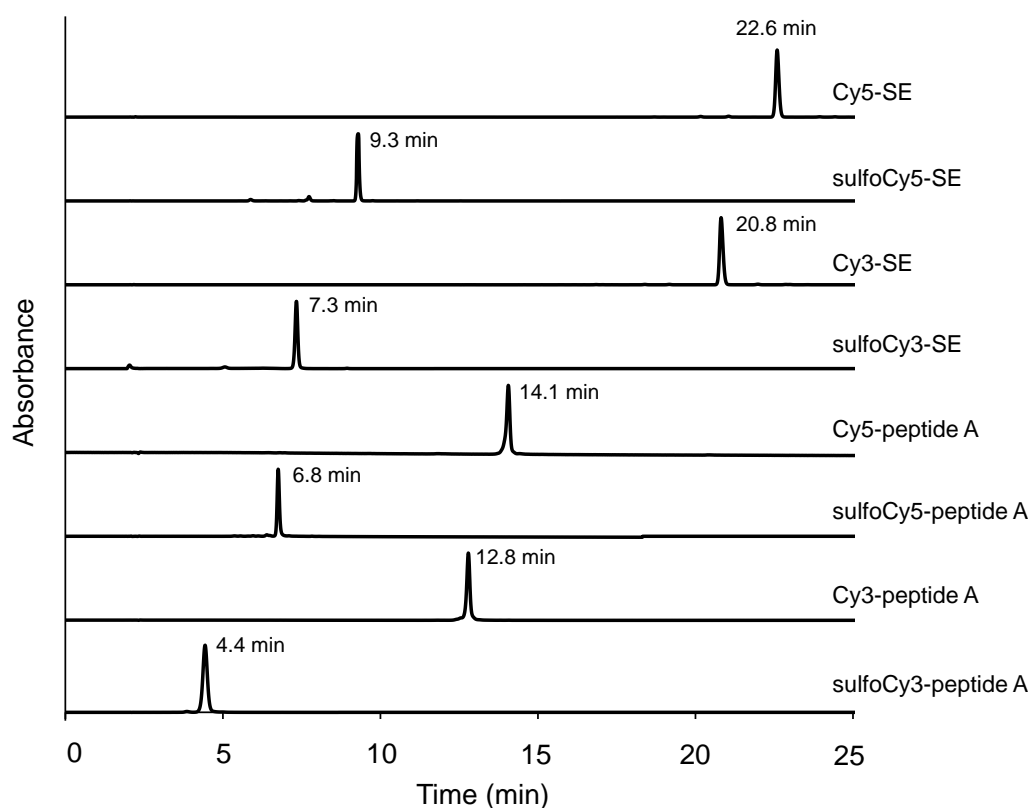

**Figure S1.** HPLC charts of dye-SE and dye-peptide A conjugates. The compounds were analyzed by reverse-phase HPLC (eluent A: H<sub>2</sub>O/0.1% trifluoro acetic acid (TFA), eluent B: CH<sub>3</sub>CN/0.1%TFA, A:B = 80:20 to 20:80 in 25 min). The detection wavelengths were 649 nm and 545 nm for Cy5/sulfoCy5 and Cy3/sulfoCy3, respectively. The retention time is indicated. .
